# Supplementary material for: Tertiary alcohol preferred: Hydroxylation of trans-3-methyl-L-proline with proline hydroxylases
Source: publisher site journal article supplement (doi:10.3762/bjoc.7.193), 2011-12-05
Supplement: Additional file 1 [file 1860-5397-7-193-S1.pdf]

# Supporting Information

for

## Tertiary alcohol preferred: Hydroxylation of *trans*-3-methyl-L-proline with proline hydroxylases

Christian Klein and Wolfgang Hüttel\*

Address: Institute of Pharmaceutical Sciences, Department of Pharmaceutical and Medicinal Chemistry, Albert-Ludwigs-Universität Freiburg, Albertstr. 25, 79104 Freiburg, Germany

Email: Wolfgang Hüttel - wolfgang.huettel@pharmazie.uni-freiburg.de

\* Corresponding author

Email: Wolfgang Hüttel - wolfgang.huettel@pharmazie.uni-freiburg.de

\* Corresponding author

### Experimental section, analytical data (NMR and MS)

#### Table of contents

|                                                                           |     |
|---------------------------------------------------------------------------|-----|
| 1. Experimental procedures                                                | S2  |
| 2. NMR-spectra of enzymatic conversions product                           | S4  |
| 3. MS <sup>2</sup> spectrum of (3 <i>R</i> )-3-hydroxy-3-methyl-L-proline | S10 |

## 1) Experimental procedures

### a) In vitro conversions

The enzymes *cis*-P3H\_II and *cis*-P4H were produced in *E. coli* and purified as described before [S1]. The hydroxylation activities were measured in a reaction mixture containing Mes buffer (50 mM, pH 6.5), L-proline or *trans*-3-methyl-L-proline (4 mM),  $\alpha$ -ketoglutarate (10 mM), ferrous sulfate (0.5 mM), L-ascorbate (1.5 mM) and enzyme preparation in a final volume of 1 mL. To compare enzymatic activities, identical amounts of the same enzyme preparation were used for the conversion of *trans*-3-methyl-L-proline and L-proline in parallel. Reactions with *cis*P3H\_II were carried out at 37 °C and with *cis*-P4H at 25 °C for 16 h. Product formation was measured fluorometrically by HPLC at 254 nm excitation wavelength and at 316 nm emission wavelength after Fmoc-derivatization as previously described [S1]. Gradient program 2 [S1] was used with a LiChrosorb RP-18 (5  $\mu$ , 250  $\times$  4.0 mm) or a LiChrosorb100 RP-18 EC (5  $\mu$  column, 250  $\times$  4.0 mm) purchased from CS (Chromatographie-Service), Langerwehe, Germany. All retention times were verified with reference compounds.

### b) In vivo production of (3*R*)-3-hydroxy-3-methyl-L-proline

100 mL of an amino-acid-free high-cell-density medium (Table S1) was used for cultivation of proline hydroxylase producing strains under aerobic conditions as described before for in vivo hydroxylation of L-pipecolic acid [S1]. At  $OD_{600} = 3-4$  IPTG was added to achieve a final concentration of 0.2 mM. Subsequently, 26 mg of *trans*-3-methyl-L-proline (2 mM) and 14 mg  $FeSO_4 \cdot 7H_2O$  (0.5 mM) were added. The cells were incubated for 72–120 h at 28 °C until conversions were complete. The reactions were monitored by HPLC. Ion-exchange chromatography was used for

isolation of (3*R*)-3-hydroxy-3-methyl-L-proline under the same conditions as described for hydroxyprolines [S1].

**Table S1:** High-cell-density medium [S2].

|                                                     |           |
|-----------------------------------------------------|-----------|
| KH <sub>2</sub> PO <sub>4</sub>                     | 16.6 g/L  |
| NH <sub>4</sub> NaHPO <sub>4</sub>                  | 4.0 g/L   |
| citric acid                                         | 2.1 g/L   |
| Fe <sub>2</sub> (SO <sub>4</sub> ) <sub>3</sub>     | 0.075 g/L |
| boric acid                                          | 3.8 mg/L  |
| MnCl <sub>2</sub> ·4H <sub>2</sub> O                | 18.8 mg/L |
| EDTA·2H <sub>2</sub> O                              | 10.5 mg/L |
| CuCl <sub>2</sub> ·2H <sub>2</sub> O                | 1.9 mg/L  |
| Na <sub>2</sub> MoO <sub>4</sub> ·2H <sub>2</sub> O | 3.1 mg/L  |
| CoCl <sub>2</sub> ·6H <sub>2</sub> O                | 3.1 mg/L  |
| ZnSO <sub>4</sub> ·2H <sub>2</sub> O                | 10.0 mg/L |
| After autoclaving, addition of:                     |           |
| glycerol                                            | 1% (v/v)  |
| MgSO <sub>4</sub> ·2H <sub>2</sub> O                | 1.5 g/L   |
| Adjust pH with 25% (v/v) NH <sub>3</sub> to         | 6.8       |

## 2) NMR spectra of enzymatic conversions product

(3*R*)-3-Hydroxy-3-methyl-L-proline = (2*S*,3*R*)-3-hydroxy-3-methylpyrrolidine-2-carboxylic acid

$^1\text{H}$  NMR,  $^{13}\text{C}$  NMR and  $^1\text{H}^1\text{H}$ -COSY NMR,  $^1\text{H}^{13}\text{C}$  HSQC NMR, 1D and 2D-NOESY

NMR spectra were recorded at 400 MHz ( $^1\text{H}$ ) and 100 MHz ( $^{13}\text{C}$ ) on a Bruker Avance DRX 400 (Baker Biospin GmbH, Rheinstetten, Germany) in  $\text{D}_2\text{O}$  or  $\text{CD}_3\text{OD}$ . Chemical shifts refer to  $\text{H}_2\text{O}$  ( $\delta$   $^1\text{H}$  = 4.80 ppm) or methanol ( $\delta$   $^1\text{H}$  = 3.34 ppm).

### a) $^1\text{H}$ NMR

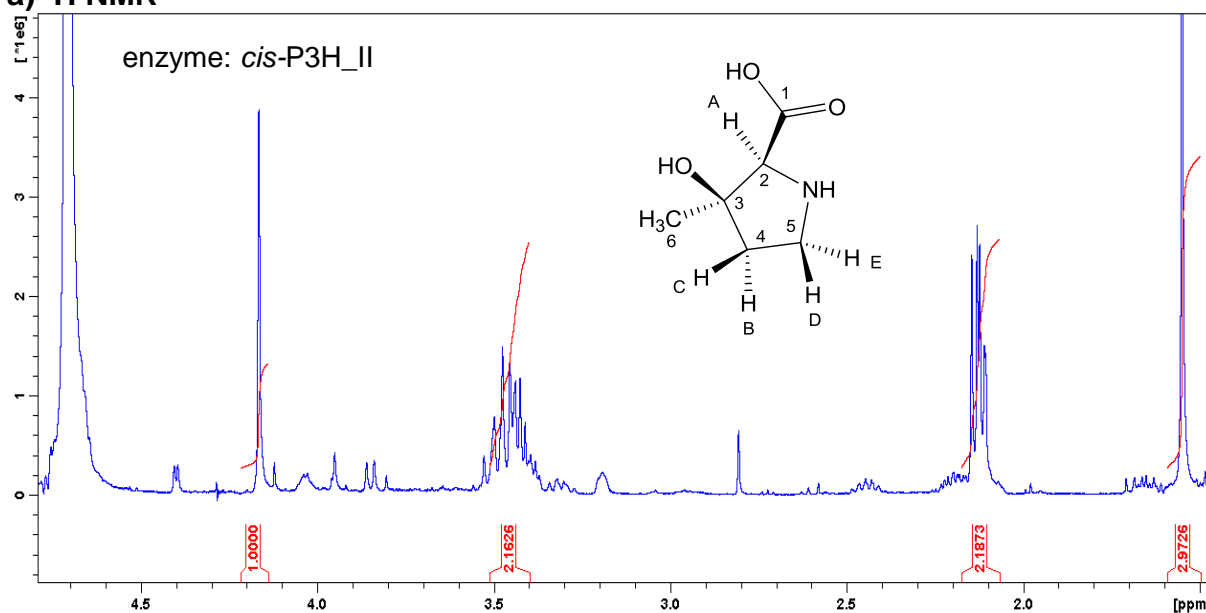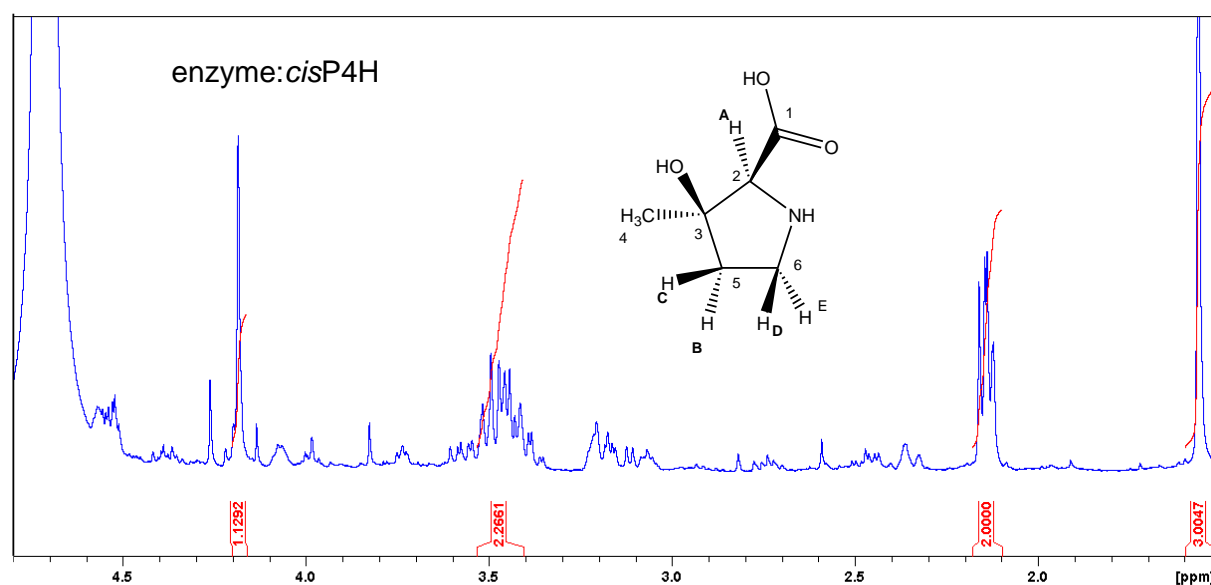

$^1\text{H}$  NMR (400 MHz,  $\text{D}_2\text{O}$ )  $\delta$  = 1.55 (s, 3H,  $\text{CH}_3$ ), 2.13 (dd,  $J$  = 8.89 Hz,  $J$  = 6.10 Hz, 2H,  $\text{CH}_2$ -C,  $\text{CH}_2$ -B), 3.46 (m, 2H,  $\text{CH}_2$ -D,  $\text{CH}_2$ -E), 4.16 (s, 1H,  $\text{CH}$ -A).

b)  $^{13}\text{C}$  NMR

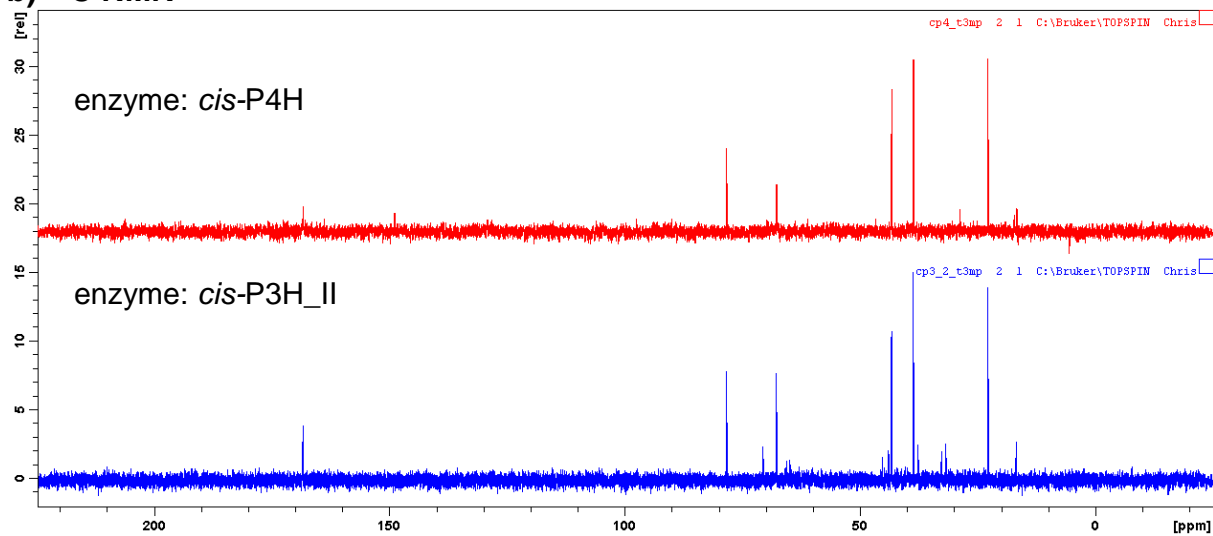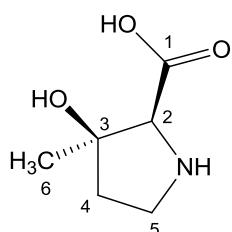

$^{13}\text{C}$  NMR (100 MHz, D<sub>2</sub>O)  $\delta$  = 23.0 (C-6), 38.6 (C-4), 43.3 (C-5), 67.9 (C-2), 78.5 (C-3), 168.4 (C-1).

c)  $^1\text{H}^1\text{H}$  COSY NMR

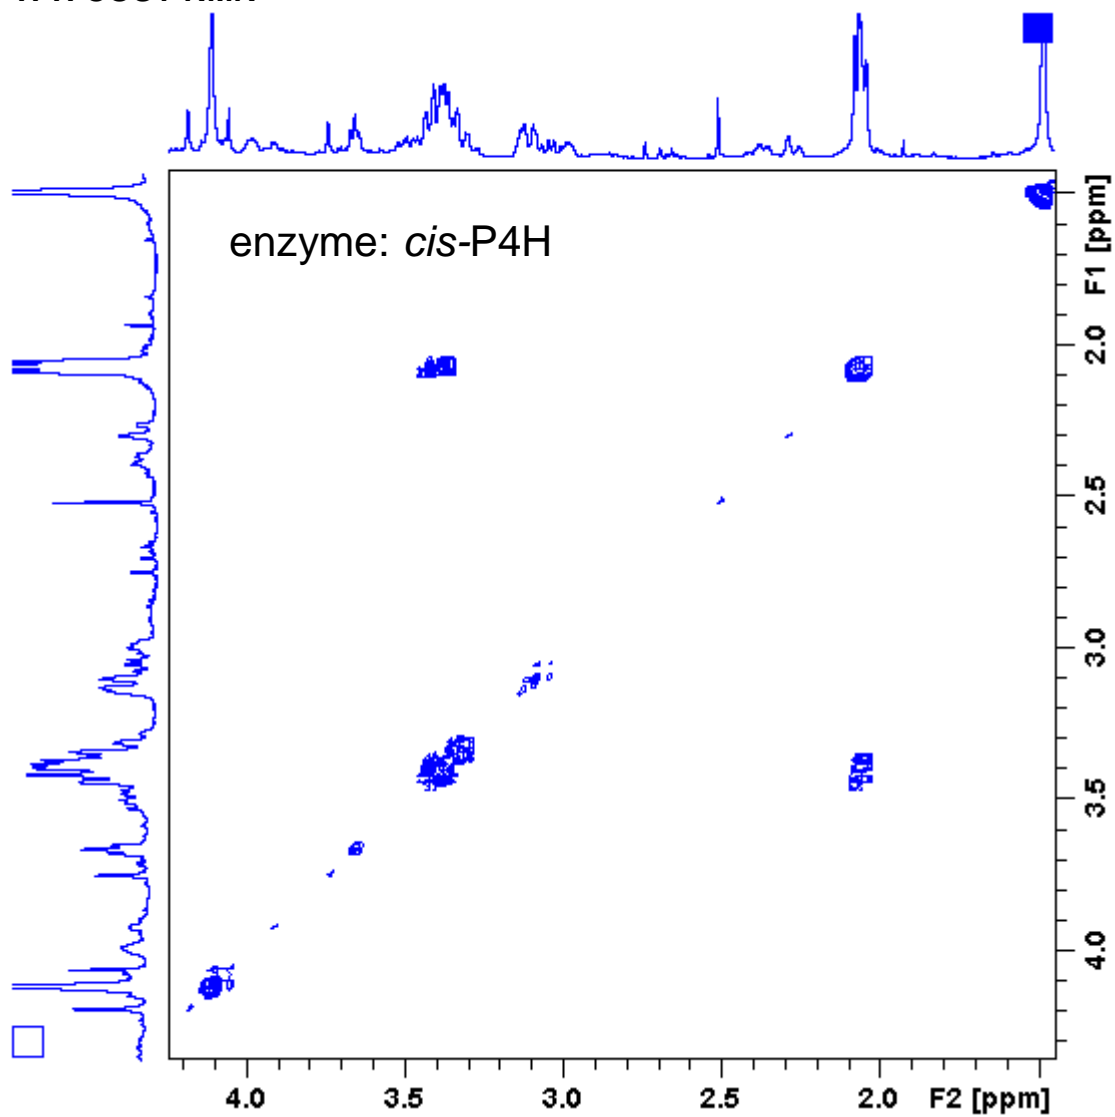

D<sub>2</sub>O, 400 MHz,  $\delta$  (ppm):

|      |      |
|------|------|
| 1.55 | —    |
| 2.13 | 3.46 |
| 4.16 | —    |

d)  $^1\text{H}^{13}\text{C}$  HSQC NMR

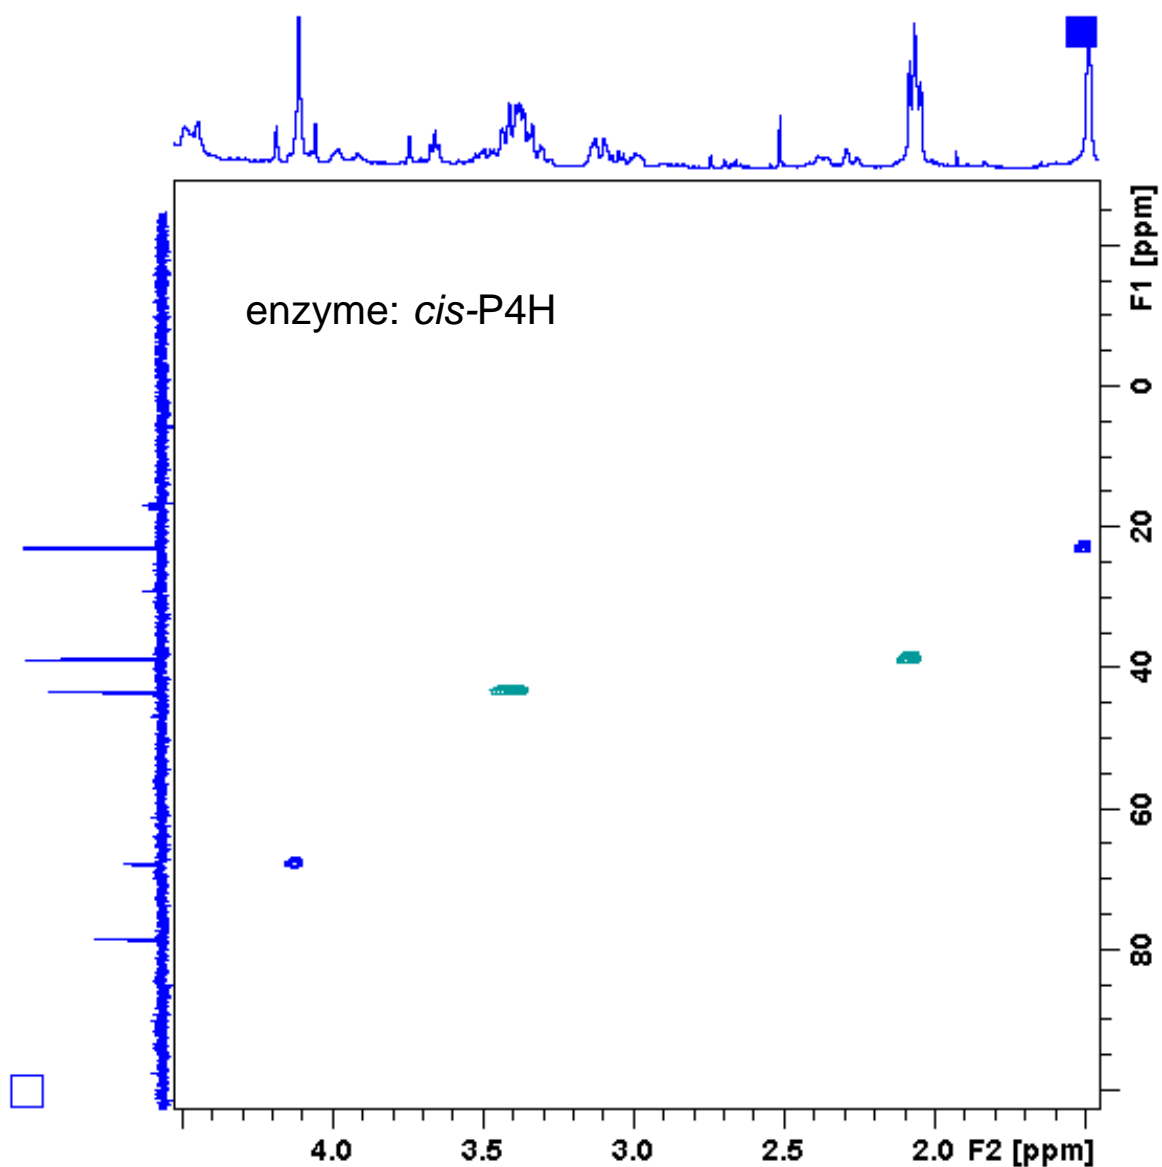

$\text{D}_2\text{O}$ ,  $^1\text{H}$ : 400 MHz,  $^{13}\text{C}$  100 MHz,  $\delta$  (ppm):

|      |      |               |
|------|------|---------------|
| 1.55 | 23.0 | $\text{CH}_3$ |
| 2.13 | 38.6 | $\text{CH}_2$ |
| 3.46 | 43.3 | $\text{CH}_2$ |
| 4.16 | 67.9 | $\text{CH}$   |

e) 2D-NOESY NMR

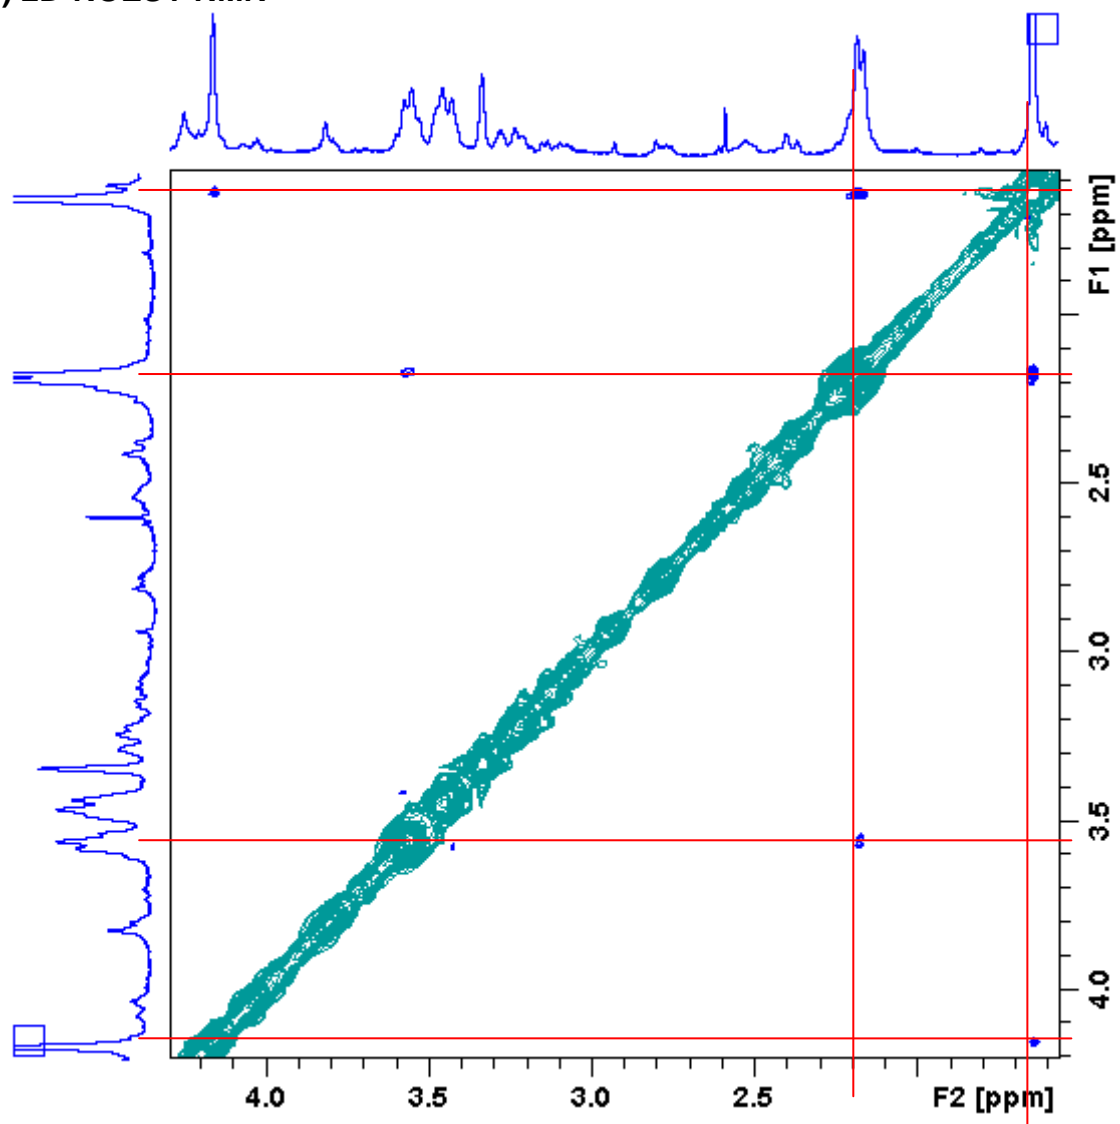

CD<sub>3</sub>OD, (400 MHz)

1.65 ppm → 2.18 ppm; 4.16 ppm

2.18 ppm → 1.6 ppm; 3.56 ppm



## f) 1D-NOESY NMR

irradiation at 1.65 ppm (CH<sub>3</sub>)

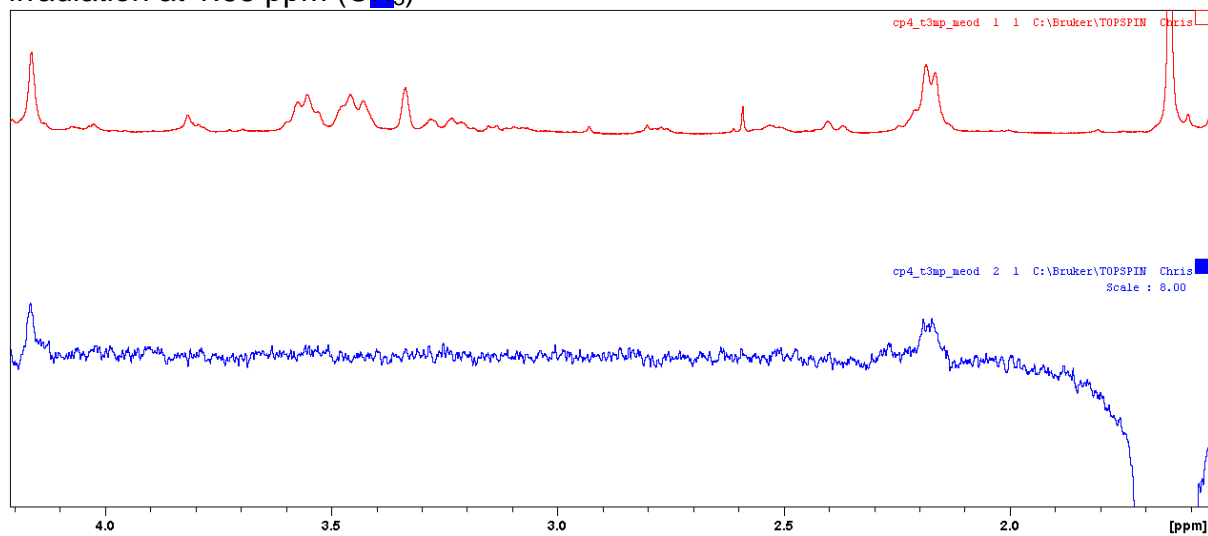

CD<sub>3</sub>OD, (400 MHz)

1.65 ppm → 2.18 ppm; 4.16 ppm

irradiation at 4.16 (CH-A)

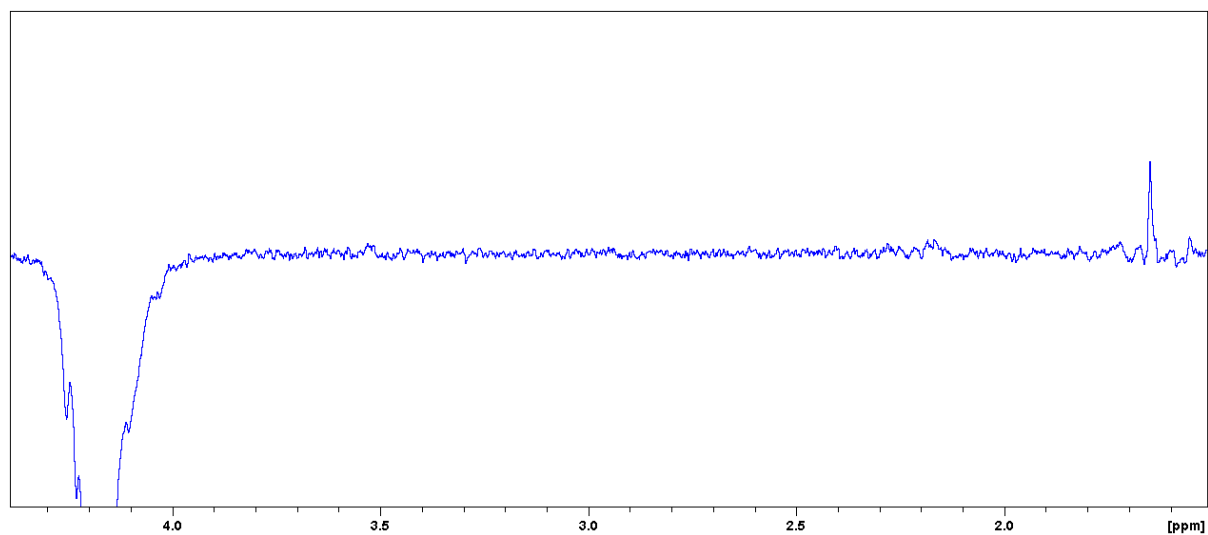

CD<sub>3</sub>OD, (400 MHz)

4.16 ppm → 1.65 ppm

### 3) Mass spectrometry

MS- and MS<sup>2</sup>-analyses were performed with a API2000 Mass Spectrometer equipped with a turbospray ion source (Applied Biosystems, Carlsbad, CA, USA).  
Parameter: Product ion (MS<sup>2</sup>): Ion source gas 1: 30 psi, ion source gas 2: 30 psi, collision gas: 6 psi, curtain gas: 10 psi, ionspray voltage: 5500 V, temperature: 400 °C, declustering potential: 50 V, focusing potential: 300 V, entrance potential: 10 V, collision energy: 25, collision cell exit potential: 3.

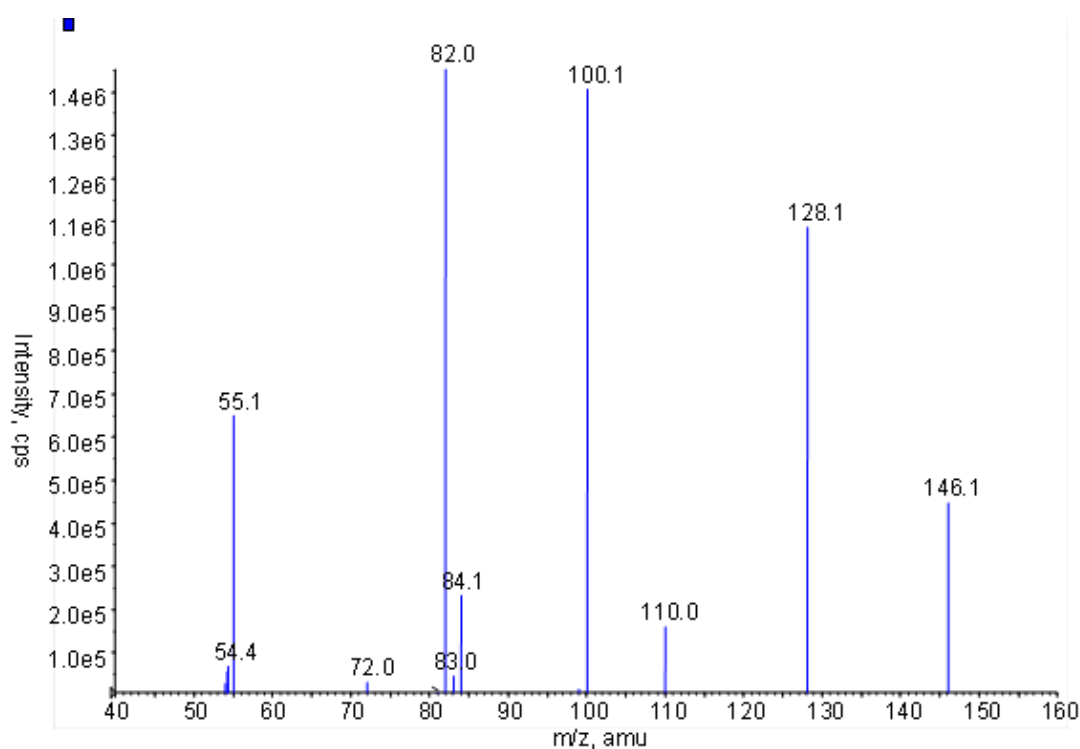

Tandem mass spectrometry: MS<sup>2</sup> of molecule peak 146 [M + 1]<sup>+</sup>

MS<sup>2</sup> m/z (%) 146 (31) [M + 1]<sup>+</sup>, 128 (75) [C<sub>6</sub>H<sub>9</sub>NO<sub>2</sub> + 1]<sup>+</sup>, 110 (11) [C<sub>6</sub>H<sub>7</sub>NO + 1]<sup>+</sup>,  
100 (97) [C<sub>5</sub>H<sub>9</sub>NO + 1]<sup>+</sup>, 84 (16) [C<sub>4</sub>H<sub>5</sub>NO + 1]<sup>+</sup>, 82 (100) [C<sub>5</sub>H<sub>7</sub>N + 1]<sup>+</sup>, 55 (45)

C<sub>6</sub>H<sub>11</sub>NO<sub>3</sub> MW: 145.16 g·mol<sup>-1</sup>

## References

- S1 Klein, C.; Hüttel, W. *Adv. Synth. Catal.* **2011**, *353*, 1375–1383.  
doi:10.1002/adsc.201000863
- S2 Horn, U.; Strittmatter, W.; Krebber, A.; Knüpfer, U.; Kujau, M.; Wenderoth, R.; Müller, K.; Matzku, S.; Plückthun, A.; Riesenberger, D. *Appl. Microbiol. Biotechnol.* **1996**, *46*, 524–532. doi:10.1007/s002530050855
